# Supplementary material for: Urinary Concentrations of Insecticide and Herbicide Metabolites among Pregnant Women in Rural Ghana: A Pilot Study
Source: PubMed Central journal article supplement (PMC5409555; doi:10.3390/ijerph14040354), 2017-03-29
Supplement: ijerph-14-00354-s001.pdf [file ijerph-14-00354-s001.pdf]

## Supplementary Materials: Urinary Concentrations of Insecticide and Herbicide Metabolites among Pregnant Women in Rural Ghana: A Pilot Study

**Table S1: Creatinine-adjusted urinary concentrations of biomarkers of organophosphate and pyrethroid insecticides, and select herbicides among 17 pregnant women in rural Ghana (n=51 samples).**

| Biomarker <sup>†</sup> | Number > LOD (%) | LOD (µg/L) | Range of detectable (µg/g) | GM in µg/g, Cr-corrected (95% CI) | IQR (µg/g) | 95 <sup>th</sup> centile (µg/g) | NHANES <sup>28</sup> GM (µg/g) for females 2009-10 <sup>‡</sup> | NHANES <sup>28</sup> 95 <sup>th</sup> centile (µg/g) for females 2009-10 <sup>‡</sup> | ICC  |
|------------------------|------------------|------------|----------------------------|-----------------------------------|------------|---------------------------------|-----------------------------------------------------------------|---------------------------------------------------------------------------------------|------|
| <u>OPs</u>             |                  |            |                            |                                   |            |                                 |                                                                 |                                                                                       |      |
| <i>Specific</i>        |                  |            |                            |                                   |            |                                 |                                                                 |                                                                                       |      |
| TCPy                   | 40/51 (78.4%)    | 0.1        | 0.50-13.36                 | 1.32 (0.92-1.89)                  | 2.45       | 9.15                            | 0.86 (0.77-0.95)                                                | 3.68 (3.18-4.10)                                                                      | 0.41 |
| IMPY                   | 19/49 (38.8%)    | 0.1        | 0.12-5.48                  | *                                 | *          | 1.83                            | *                                                               | 0.58 (0.50-0.71)                                                                      | *    |
| PNP                    | 46/51 (90.1%)    | 0.1        | 0.50-16.63                 | 1.73 (1.34-2.24)                  | 1.81       | 10.20                           | 0.48 (0.43-0.54)                                                | 2.72 (2.32-3.46)                                                                      | 0.42 |
| <i>Nonspecific</i>     |                  |            |                            |                                   |            |                                 |                                                                 |                                                                                       |      |
| DEDTP                  | 2/51 (3.9%)      | 0.5        | 0.84-6.91                  | *                                 | *          | *                               | *                                                               | *                                                                                     | *    |
| DEP                    | 7/51 (13.7%)     | 0.1        | 0.45-37.77                 | *                                 | *          | *                               | *                                                               | 16.5 (13.1-20.9)                                                                      | *    |
| DMDTP                  | 9/51 (17.6%)     | 0.1        | 0.15-5.11                  | *                                 | *          | *                               | *                                                               | 7.18 (4.22-11.1)                                                                      | *    |
| DMTP                   | 14/51 (27.4%)    | 0.1        | 0.18-8.42                  | *                                 | *          | 4.21                            | 2.81 (2.40-3.29)                                                | 41.2 (27.4-60.8)                                                                      | *    |
| DETP                   | 6/51 (11.8%)     | 1          | 0.60-7.76                  | *                                 | *          | *                               | *                                                               | 4.48 (3.30-5.73)                                                                      | *    |
| <u>Pyrethroids</u>     |                  |            |                            |                                   |            |                                 |                                                                 |                                                                                       |      |
| 4-F-3-PBA              | 2/51 (3.9%)      | 0.1        | 0.29-1.62                  | *                                 | *          | *                               | *                                                               | *                                                                                     | *    |
| 3-PBA                  | 37/49 (75.5%)    | 0.1        | 0.13-9.61                  | 0.58 (0.43-0.77)                  | 0.85       | 3.71                            | 0.51 (0.45-0.56)                                                | 5.86 (4.58-8.90)                                                                      | 0.03 |
| Trans-DCCA             | 2/51 (3.9%)      | 0.6        | 3.12-7.32                  | *                                 | *          | *                               | *                                                               | 5.30 (3.54-8.27)                                                                      | *    |
| <u>Herbicides</u>      |                  |            |                            |                                   |            |                                 |                                                                 |                                                                                       |      |
| 2,4-D                  | 36/51 (70.6%)    | 0.15       | 0.19- 715.83               | 1.11 (0.70-1.76)                  | 1.96       | 44.80                           | 0.33 (0.30-0.37)                                                | 1.40 (1.21-1.55)                                                                      | 0.02 |
| 2,4,5-T                | 0/51 (0%)        | 0.1        | Not applicable             | *                                 | *          | *                               | *                                                               | *                                                                                     | *    |

CI= confidence interval; Cr= creatinine; GM= geometric mean; ICC= intraclass correlation coefficient; IQR= interquartile range; LOD= limit of detection; NHANES= National Health and Nutrition examination Survey; OPs= organophosphates.

\* Not calculated: proportion of results below limit of detection was too high to provide a valid result.

<sup>†</sup>Parent chemicals of the measured analytes: 3,5,6-Trichloro-2-pyridinol (TCPy)= chlorpyrifos, chlorpyrifos-methyl; 2-isopropyl-4-methyl-6-hydroxypyrimidine (IMPY)= diazinon; *para*-Nitrophenol (PNP)= parathion, methyl parathion; 4-fluoro-3-phenoxybenzoic acid (4-F-3-PBA)= cyfluthrin; 3-phenoxybenzoic acid (3-PBA)= cyhalothrin, cypermethrin, deltamethrin, fenpropathrin, permethrin, tralomethrin; *trans*-3,2,2-Dichlorovinyl-2,2-dimethylcyclopropane carboxylic acid (*trans*-DCCA)= permethrin, cypermethrin, cyfluthrin; 2,4-Dichlorophenoxyacetic acid (2,4-D)= 2,4-Dichlorophenoxyacetic acid and its esters; 2,4,5-Trichlorophenoxyacetic acid (2,4,5-T)= 2,4,5-Trichlorophenoxyacetic acid.

<sup>‡</sup> Most recent data from NHANES for the nonspecific organophosphates (dialkyl phosphate metabolites) is from years 2007-08.

**Table S2: Potential determinants of pesticide and herbicide urinary concentrations among study participants.**

|                                                                                       | Organophosphates<br>GM in µg/L (n) |      | Pyrethroids<br>GM in µg/L<br>3-PBA | Herbicide<br>GM in µg/L<br>2,4-D |
|---------------------------------------------------------------------------------------|------------------------------------|------|------------------------------------|----------------------------------|
|                                                                                       | TCPy                               | PNP  |                                    |                                  |
| <u>Age</u>                                                                            |                                    |      |                                    |                                  |
| ≥ 30 years (n=5)                                                                      | 0.43                               | 0.71 | 0.36                               | 1.48                             |
| < 30 years (n=12)                                                                     | 0.59                               | 0.71 | 0.19                               | 0.28                             |
| <u>Education</u>                                                                      |                                    |      |                                    |                                  |
| Primary school or less (n=10)                                                         | 0.37                               | 0.73 | 0.25                               | 0.66                             |
| More than primary school (n=7)                                                        | 0.93                               | 0.68 | 0.20                               | 0.27                             |
| <u>Farming</u>                                                                        |                                    |      |                                    |                                  |
| <i>Is farming your occupation?</i>                                                    |                                    |      |                                    |                                  |
| Yes (n=6)                                                                             | 0.27                               | 0.63 | 0.21                               | 0.95                             |
| No (n=11)                                                                             | 0.80                               | 0.76 | 0.24                               | 0.31                             |
| <u>Residential use of pesticides</u>                                                  |                                    |      |                                    |                                  |
| <i>Does the household use chemicals to kill insects/rodent in or around the home?</i> |                                    |      |                                    |                                  |
| Yes (n=8)                                                                             | 0.50                               | 0.66 | 0.21                               | 0.37                             |
| No (n=9)                                                                              | 0.58                               | 0.76 | 0.25                               | 0.55                             |
| <u>Source of water</u>                                                                |                                    |      |                                    |                                  |
| <i>What is the household source of water?</i>                                         |                                    |      |                                    |                                  |
| Pumped, piped or public tap (n=13)                                                    | 0.57                               | 0.65 | 0.18                               | 0.31                             |
| From natural stream/river/lake (n=4)                                                  | 0.45                               | 0.96 | 0.53                               | 1.57                             |
| <u>Malaria control measures</u>                                                       |                                    |      |                                    |                                  |
| <i>Household owns bednet?</i>                                                         |                                    |      |                                    |                                  |
| Yes (n=13)                                                                            | --                                 | --   | 0.24                               | --                               |
| No (n=4)                                                                              | --                                 | --   | 0.21                               | --                               |
| <i>Slept under a bed last night?</i>                                                  |                                    |      |                                    |                                  |
| Yes (n=10)                                                                            | --                                 | --   | 0.26                               | --                               |
| No (n=7)                                                                              | --                                 | --   | 0.19                               | --                               |
| <i>Sleeps under bednet most nights?</i>                                               |                                    |      |                                    |                                  |
| Yes (n=11)                                                                            | --                                 | --   | 0.25                               | --                               |
| No (n=6)                                                                              | --                                 | --   | 0.20                               | --                               |

2,4-D= 2,4-Dichlorophenoxyacetic acid; 3-PBA= 3-phenoxybenzoic acid; Cr= creatinine; GM= geometric mean; IMPY=2-isopropyl-4-methyl-6-hydroxypyrimidine; PNP= *para*-Nitrophenol; TCPy=3,5,6-Trichloro-2-pyridinol.
